# The loss of the pyoverdine secondary receptor in *Pseudomonas aeruginosa* results in a fitter strain suitable for population invasion

Jaime González<sup>a</sup>, Manuel Salvador<sup>a</sup>, Özhan Özkaya<sup>b</sup>, Matt Spick<sup>c</sup>, Catia Costa<sup>c</sup>, Melanie J. Bailey<sup>c</sup>, Claudio Avignone-Rossa<sup>a</sup>, Rolf Kümmerli<sup>b</sup> and José I. Jiménez<sup>a\*</sup>

<sup>a</sup> Faculty of Health and Medical Sciences, University of Surrey, Guildford, GU2 7XH, United Kingdom

<sup>b</sup> Department of Quantitative Medicine, University of Zurich, Winterthurerstrasse 190, 8057, Zurich, Switzerland

<sup>c</sup> Faculty of Engineering and Physical Sciences, University of Surrey, Guildford, GU2 7XH, United Kingdom

\* Correspondence: [jjimenez@surrey.ac.uk](mailto:jjimenez@surrey.ac.uk), University of Surrey, Guildford, GU2 7XH, +44 01483 68 4557

## Abstract

The rapid emergence of antibiotic resistant bacterial pathogens constitutes a critical problem in healthcare and requires the development of novel treatments. Potential strategies include the exploitation of microbial social interactions based on public goods, which are produced at a fitness cost by cooperative microorganisms, but can be exploited by cheaters that do not produce these goods. Cheater invasion has been proposed as a ‘Trojan horse’ approach to infiltrate pathogen populations with strains deploying built-in weaknesses (e.g. sensitiveness to antibiotics). However, previous attempts have been often unsuccessful because population invasion by cheaters was prevented by various mechanisms including the presence of spatial structure (e.g. growth in biofilms), which limits the diffusion and exploitation of public goods. Here we followed an alternative approach and examined whether the manipulation of public good uptake and not its production could result in potential ‘Trojan horses’ suitable for population invasion. We focused on the siderophore pyoverdine produced by the human pathogen *Pseudomonas aeruginosa* MPAO1 and manipulated its uptake by deleting and/or overexpressing the pyoverdine primary (FpvA) and secondary (FpvB) receptors. We found that receptor synthesis feeds back on pyoverdine production and uptake rates, which led to strains with altered pyoverdine-associated costs and benefits. Moreover, we found that the receptor FpvB was advantageous under iron-limited conditions but revealed hidden costs in the presence of an antibiotic stressor (gentamicin). As a consequence, FpvB mutants became the fittest strain under gentamicin exposure, displacing the wildtype in liquid cultures, and in biofilms and during infections of the wax moth larvae *Galleria mellonella*, which both represent structured environments. Our findings reveal that an evolutionary trade-off associated with the costs and benefits of a versatile pyoverdine uptake strategy can be harnessed for devising a Trojan horse candidate for medical interventions.

Keywords: Evolutionary dynamics, public goods, cooperation, population invasion, antimicrobial resistance

## Introduction

Microorganisms establish communities where social interactions based on cooperation and competition take place (1). Cooperative strategies, like the synthesis and secretion of essential public goods, usually come with a fitness cost for the cooperative individuals, while carrying a benefit for the whole community (2). These strategies are open to exploitation by cheaters, members of the community who do not pay the cost of producing the public good while taking advantage of it, potentially causing the collapse of the population (1). In this context, the use of cheaters has been proposed to invade and replace populations of pathogens as a way of treating infections (3). Tailor-made cheaters could therefore be used as ‘Trojan horses’ that could keep pathogens resistant to antibiotics at bay by replacing them with sensitive strains (3). The use of cheaters for invasion is, however, hindered because virulence rarely depends on a single essential determinant (4) and by mechanisms preserving cooperation. These include the formation of biofilms, where the diffusion of public goods is limited and restricted to clonal members, thus limiting the emergence of noncooperative individuals (5,6).

Microbial social interactions involving public goods have been widely investigated in the opportunistic human pathogen *Pseudomonas aeruginosa* using the well-studied iron chelator pyoverdine as a model public good (7). Pyoverdine synthesis involves the expression of a large number of genes (8,9) and it generates a fitness cost to producing cells that can be exploited by non-producers (10). Previous attempts at producing a Trojan horse

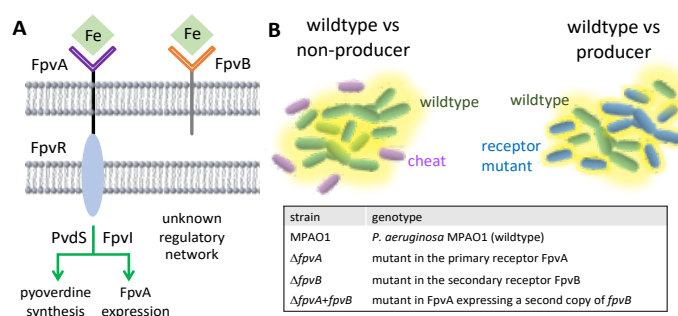

**Fig. 1. (A) The regulatory network of the pyoverdine receptors in *P. aeruginosa*.** Ferripyoverdine (green diamonds) bound to the primary receptor FpvA triggers a regulatory signalling cascade resulting in the activation of pyoverdine biosynthesis and FpvA receptor expression. Specifically, pyoverdine-signalling inactivates FpvR (an anti-sigma factor), thereby activating PvdS and FpvI, the sigma factors that control pyoverdine and receptor synthesis, respectively. FpvB participates in the uptake of pyoverdine and its regulatory network (8). **(B) Outline of the strategy in this study.** Population invasion should be possible with pyoverdine producing strains endowed with optimised cost-to-benefit ratios. The table shows the nomenclature of strains used in this work.

in this system have focused on generating mutants in the biosynthetic pathway of pyoverdine. These non-producers can

invade a wildtype population in homogeneous environments (e.g. liquid cultures) but fail to do so in, for instance, animal models (4,11).

In order to overcome that limitation, our study proposes a novel strategy for the generation of Trojan horses. Instead of directly interfering with the synthesis of pyoverdine, we selectively modified its uptake manipulating the pyoverdine receptors. Once pyoverdine binds to iron, the resulting ferripyoverdine is captured by cells mainly through the action of the pyoverdine primary receptor FpvA (12) although a seemingly redundant secondary receptor FpvB can perform the same role (13). In iron-limited conditions, both synthesis and reception through FpvA are pleiotropically coordinated at the transcriptional level through the action of an intricate regulatory circuit involving the activators PvdS and FpvI (14,15) (Fig. 1A). In fact, the binding of ferripyoverdine to the receptor FpvA results in the increased expression of biosynthetic operons (via PvdS) and the receptor gene (via FpvI) in a positive feedback-loop (16–18). This process is only interrupted by the action of the global repressor Fur when the intracellular iron levels are sufficiently high (19).

The secondary receptor FpvB, however, is not known to be under the control of the same regulatory network (20) and, therefore, ferripyoverdine binding to it should not lead to an increased pyoverdine synthesis. We hypothesised that altering the expression levels of the primary and secondary receptor could not only affect pyoverdine uptake but also its synthesis due to the interference with the regulatory network. Moreover, it is conceivable that the expression of a secondary, seemingly redundant, receptor could be associated with evolutionary trade-offs and only be beneficial under certain environmental conditions but be costly under others. Thus, interference with pyoverdine uptake could result in strains with a modified ratio of costs (pyoverdine synthesis) and benefits (pyoverdine reception). The specific relationship between those two properties could result in conditional fitness advantages, for example, if the mutants exhibit decreased pyoverdine production and increased cost-effective uptake (Fig. 1B). Such a strain would be able to grow independently (they are public good producers), and have the potential to displace wildtype populations in a variety of scenarios including structured environments.

## Results

### Altered expression of pyoverdine receptors results in different growth and pyoverdine production phenotypes

We monitored growth and pyoverdine production dynamics of *P. aeruginosa* MPAO1 (MPAO1) and the mutants in the primary ( $\Delta fpvA$ ) and secondary ( $\Delta fpvB$ ) receptors, as well as a mutant that does not produce pyoverdine ( $\Delta pvdA$ ) when cultured under iron limitation in the absence or presence of exogenous pyoverdine (Fig. 2 and Fig. S1). In this scenario we define the benefit of a strain by its maximum growth rate achieved which is obtained from the first derivative of the growth curve (see methods). Maximum growth rate is a proxy of the physiological/metabolic efficiency of a cell when protein production is at the steady state. Similarly, the cost of a strain is defined as the pyoverdine produced up to the time in which the maximum growth rate is achieved. This reflects a metabolic investment that greatly conditions the growth rate at the early stages of growth of the strains tested.

All strains exhibited similar maximum growth rates (ranging from  $0.0505 \pm 0.0013$  to  $0.0578 \pm 0.0126$  h<sup>-1</sup>) with the exception of the pyoverdine deficient  $\Delta pvdA$  mutant, which had a significantly reduced growth rate ( $0.026 \pm 0.001$  h<sup>-1</sup>). Moreover, the mutant  $\Delta fpvA$  lacking the primary receptor showed a longer lag phase

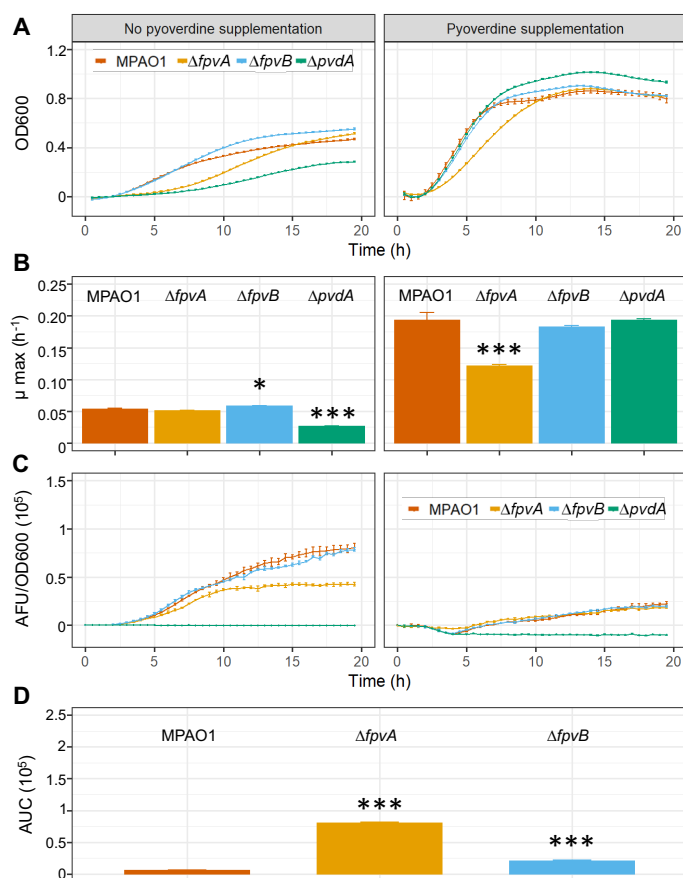

**Fig. 2. Kinetics of bacterial growth and pyoverdine production.** (A) Growth kinetics of MPAO1 and mutants in iron-limited CAA in the absence (left column) and presence (right column) of exogenous pyoverdine. (B) Maximum growth rates of the strains obtained from the analysis of growth kinetics. (C) Pyoverdine production per cell over time determined as the fluorescent signal of the culture divided by the optical density at 600 nm (OD600). (D) Pyoverdine accumulated in cultures of each of the strains until reaching the maximum growth rate in the absence of exogenous pyoverdine. Error bars represent standard error of the mean from three biological replicates. Asterisks show significant differences compared to MPAO1 in a One-way ANOVA test complemented with a Dunnett post-hoc test. Growth curves and their first derivatives are shown in Fig S1.

compared to the other producers (Figs. 2A and B left column; Fig. S1). When supplemented with exogenous pyoverdine, which should alleviate the burden of production, all the strains exhibited similar growth rates (ranging between  $0.181 \pm 0.002$  and  $0.192 \pm 0.012$  h<sup>-1</sup>) and kinetics except for  $\Delta fpvA$ , which had a significantly reduced growth rate ( $0.121 \pm 0.00176$  h<sup>-1</sup>) and an extended lag-phase (Fig. 2A and B right column; Fig. S1). Altogether, these results suggest that FpvA is essential for optimal pyoverdine uptake rates, and that the secondary receptor FpvB can only partly compensate for the lack of FpvA, leading to a suboptimal pyoverdine uptake.

Next, we inspected pyoverdine production in all strains in both conditions. Under iron-limited conditions, the  $\Delta fpvA$  mutant exhibited a lower pyoverdine synthesis per cell but a larger investment prior to reaching the maximum growth rate, suggesting that the primary receptor plays an important role in both efficient uptake and coordination of pyoverdine synthesis (Fig. 2C and D; Fig. S1). Interestingly, the wildtype strain

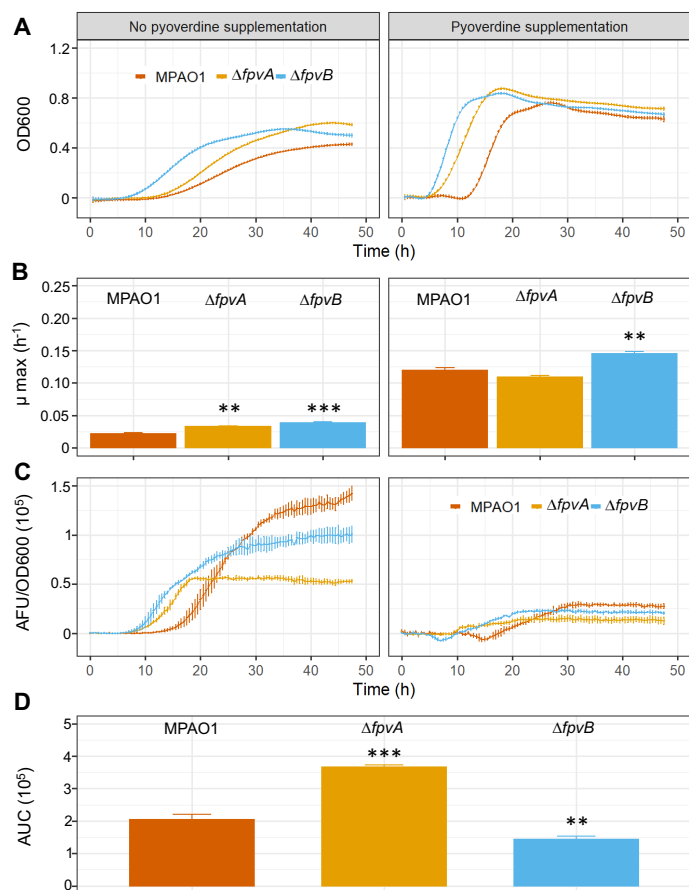

**Fig. 3. Kinetics of bacterial growth and pyoverdine production in the presence of gentamicin.** (A) Growth kinetics of MPAO1 and mutants in iron-limited CAA supplemented with gentamicin in the absence (left column) and presence (right column) of exogenous pyoverdine. (B) Maximum growth rates of the strains obtained from the analysis of growth kinetics. (C) Kinetics of pyoverdine production per cell. (D) Pyoverdine accumulated in cultures of each of the strains until reaching the maximum growth rate. Error bars represent standard error of the mean from three biological replicates. Asterisks show significant differences compared to MPAO1 in a One-way ANOVA test complemented by a Dunnett post-hoc test. Growth curves and their first derivatives are shown in Fig S2.

performed best when considering the amount of pyoverdine produced until reaching the maximal growth rate (Fig. 2D), which indicates that having two different pyoverdine receptor types (FpvA and FpvB) lead to the most economical cost-to-benefit ratio.

#### Pyoverdine production is affected by the presence of gentamicin

Previous studies have reported that the costs and benefits linked to pyoverdine biology in *P. aeruginosa* are condition-dependent (21). In particular, the cost of producing pyoverdine increased when cells were exposed to environmental stressors such as sublethal concentrations of gentamicin (22).

Since aminoglycosides are commonly used to treat *P. aeruginosa* infections (23) we inserted the *aacC1* resistance gene at the attTn7 site of all the strains and investigated synthesis of pyoverdine and reception dynamics in the presence of gentamicin (Fig. 3 and Fig. S2). In iron-limited conditions gentamicin caused longer lag phases (Fig. 3A) and a general decrease in growth rates (Fig. 3B), showing that gentamicin acts as a stressor despite strains

being resistant to it. Crucially, gentamicin altered the rank of growth rates with  $\Delta fpvB$  ( $0.038 \pm 0.0016$  h<sup>-1</sup>) and  $\Delta fpvA$  ( $0.032 \pm 0.001$  h<sup>-1</sup>) showing higher growth capacities than MPAO1 ( $0.022 \pm 0.001$  h<sup>-1</sup>). Addition of pyoverdine led to an improved growth and lag phase reduction in all the strains (Fig. 3A and B). But also here  $\Delta fpvB$  growth rate was higher ( $0.145 \pm 0.003$  h<sup>-1</sup>) compared to  $\Delta fpvA$  ( $0.109 \pm 0.0022$  h<sup>-1</sup>) and MPAO1 ( $0.12 \pm 0.004$  h<sup>-1</sup>) (Fig. 3B).

Pyoverdine production per cell over time varied fundamentally between cells in iron-limited but not in pyoverdine supplemented medium (Fig. 3C). Under iron limitation,  $\Delta fpvB$  started producing pyoverdine first, while MPAO1 showed a substantially delayed production, which is reduced in  $\Delta fpvA$ . The advantage of  $\Delta fpvB$  over the other strains is mirrored in the production levels up to maximum growth rate (Fig. 3D), where  $\Delta fpvB$  performed most economically followed by MPAO1 and  $\Delta fpvA$ . When comparing across conditions (with and without gentamicin), we found that MPAO1 produced  $30 \pm 2.7$  times more pyoverdine (as AUC ratio values) to reach its maximum growth rate with gentamicin, while the ratio was only slightly higher for  $\Delta fpvA$  ( $2.4 \pm 0.004$ ) and  $\Delta fpvB$  ( $2.58 \pm 0.17$ ), respectively (Fig. S3). Taken together, these results show that  $\Delta fpvB$  performs best under antibiotic stress, suggesting that having a secondary pyoverdine receptor involves a costly evolutionary trade-off. Thus, the  $\Delta fpvB$  mutant could be a promising candidate for a Trojan horse.

#### $\Delta fpvB$ expresses the primary receptor FpvA earlier than MPAO1 in the presence of gentamicin

We monitored the expression dynamics of the two pyoverdine receptors using transcriptional fusions in which the corresponding promoters were cloned in a Tn7 transposon (Gm<sup>R</sup>) for chromosomal delivery right upstream of a promoterless mCherry gene. Both constructions were independently integrated in single copy in the attTn7 site of the strains MPAO1,  $\Delta fpvA$  and  $\Delta fpvB$ . This allows for the monitoring of gene expression levels even in mutants unable to express the genes under study.

The expression kinetics of the primary receptor FpvA differs between MPAO1 and  $\Delta fpvB$ . In the absence of gentamicin, MPAO1 triggered the expression of the primary receptor FpvA earlier and

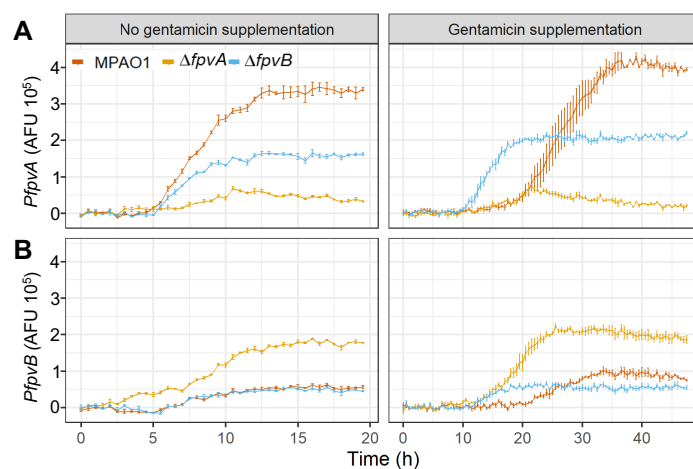

**Fig. 4. Analysis of the transcriptional activity of the promoters of *fpvA* and *fpvB* in iron limited CAA.** Transcriptional fusions between the *fpvA* (A) or *fpvB* (B) promoters and mCherry were delivered into the attTn7 of the strains indicated in the bars and tested in the absence (left columns) and presence (right columns) of gentamicin. The curves represent the fluorescent signal per cell over time. Error bars represent standard error of the mean from three biological replicates.

also displayed higher transcriptional levels compared to the  $\Delta fvpB$  strain (Fig. 4A left panel). When gentamicin was added to the cultures, the expression signal for the FpvA receptor increased overall in both the MPAO1 and  $\Delta fvpB$  strains, but  $\Delta fvpB$  transcribed *fvpA* much earlier than MPAO1 (Fig. 4A right panel). Transcriptional levels of the secondary receptor *fvpB* were low for all strains except in the mutant  $\Delta fvpA$  that seems to compensate for the lack in the primary receptor by increasing the expression of the secondary (Fig. 4B). These results highlight that  $\Delta fvpB$  has a markedly different expression pattern of the primary receptor FpvA than MPAO1, characterized by a reduced expression level combined with an earlier onset of expression in the presence of the environmental stressor. This altered expression pattern likely contributes to the fitness advantage of the  $\Delta fvpB$  mutant under gentamicin exposure.

### The conditional expression of FpvB tunes growth and pyoverdine production

Our previous results show that the loss of FpvB renders a strain with a higher growth rate and lower pyoverdine investment in the presence of gentamicin, suggesting that the competition between the two receptors controls the trade-offs between the costs and benefits associated to the public good. We therefore tested the role of the secondary receptor FpvB as a dial to tune growth dynamics in a strain that possesses both receptors (MPAO1) and a strain that only has FpvB ( $\Delta fvpA$ ) (Fig. 5; Figs. S4 and S5). To this end, a recombinant genetic construct containing *fvpB* under the regulation of a strong constitutive promoter (14F; (24)) was introduced as an extra copy in the genome, including the gentamicin resistance cassette *aacC1*.

In the presence of gentamicin, the overexpression of FpvB was advantageous for  $\Delta fvpA$  which reached a higher maximum growth rate both in iron-limited conditions ( $0.039 \pm 0.001$  vs  $0.032 \pm 0.0010$  h<sup>-1</sup>) and when exogenous pyoverdine was added ( $0.13 \pm 0.002$  vs  $0.109 \pm 0.002$  h<sup>-1</sup>) (Fig. 5A and B; Fig. S5). This shows that FpvB can alleviate iron shortage associated with the lack of the primary receptor FpvA. In stark contrast, overexpression of FpvB in MPAO1 had the opposite effect and induced a longer lag phase (Fig. 5A) and decreased the maximum growth rate ( $0.017 \pm 0.0006$  vs  $0.022 \pm 0.0009$  h<sup>-1</sup>) (Fig. 5B). This growth deficiency was partly mitigated with the addition of exogenous pyoverdine (Fig. 5A and B; Fig. S5). These findings support the view that FpvB expression is associated with substantial fitness costs in the presence of a functional FpvA receptor under gentamicin stress. The fitness trade-off associated with FpvB expression is also reflected in the pyoverdine production profiles (Fig. 5C and D), where FpvB overexpression leads to a reduction of pyoverdine per cell required to reach maximum growth rate in the  $\Delta fvpA$  strain, but leads to the opposite pattern in MPAO1 (Fig. 5D).

### The $\Delta fvpB$ mutant rapidly invades MPAO1 populations from rare under gentamicin treatment

Next, we examined whether the growth properties uncovered are predictive of population dynamics when strains with different pyoverdine uptake strategies compete directly in batch liquid cultures. To this end, gentamicin resistant GFP and RFP tagged strains were mixed in a 0.85:0.15 (MPAO1: mutant) initial proportion and transferred to iron limited CAA, with and without gentamicin supplementation. Population dynamics were monitored using flow cytometry (Fig. 6 for frequencies; see Fig. S6 for relative fitness) and we confirmed that gentamicin remained at high levels in all of the competitions (Fig. S7).

In the absence of gentamicin, we found that none of the mutants could invade MPAO1 populations (Fig. 6). While  $\Delta fvpA$  mutants went completely extinct, the  $\Delta fvpB$  and  $\Delta pvdA$  mutants

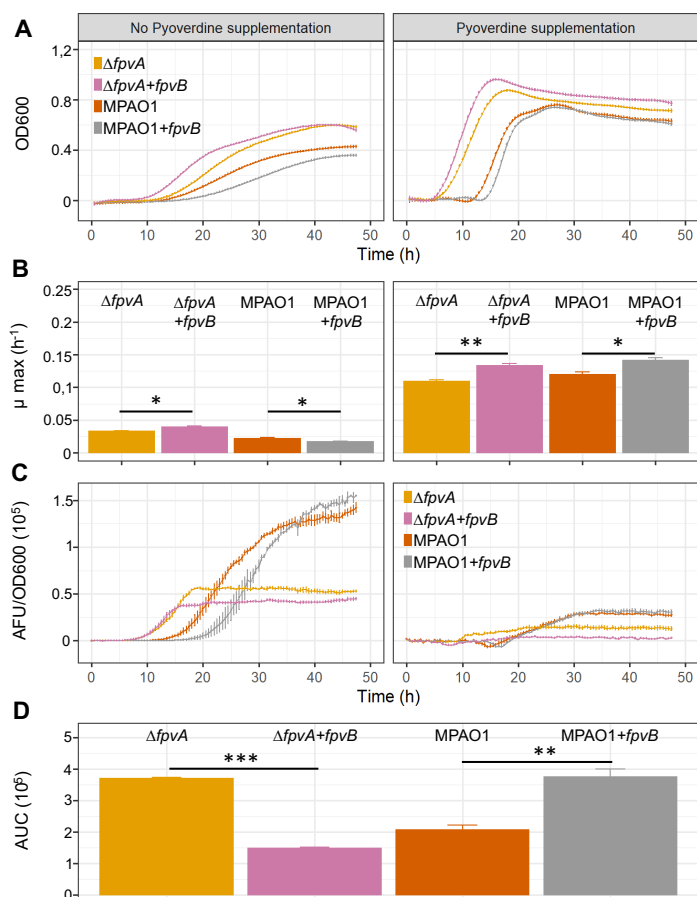

**Fig. 5. Kinetics of bacterial growth and pyoverdine production in strains overexpressing FpvB in the presence of gentamicin.** (A) Growth kinetics of MPAO1 and  $\Delta fvpA$  expressing or not an extra copy of *fvpB* in iron-limited CAA supplemented with gentamicin in the absence (left) and presence (right) of exogenous pyoverdine. (B) Maximum growth rates of the strains obtained from the analysis of growth kinetics in the same conditions. (C) Kinetics of pyoverdine production per cell. (D) Pyoverdine accumulated in cultures of each of the strains until reaching the maximum growth rate. Error bars represent standard error of the mean from three biological replicates. Asterisks show significant differences compared the corresponding 'empty' control in a t-test. A complete set of growth curves, their first derivatives and pyoverdine production kinetics is shown in Fig S5).

could co-exist with MPAO1. The latter likely due to its capacity to cheat on pyoverdine produced by MPAO1. In the presence of gentamicin, the strains  $\Delta fvpA$  and  $\Delta fvpA+fvpB$  still went extinct although showed an increase in frequency in the first 18 h of the experiment (Fig. 6). This is likely the result of MPAO1 being the fittest strain when enough pyoverdine was accumulated, which allowed to overcome the initial disadvantage. Conversely, the  $\Delta fvpB$  and  $\Delta pvdA$  mutants experienced huge fitness advantages under antibiotic stress and drove MPAO1 to the verge of extinction over the 48 hours competition. The spread of the cheating  $\Delta pvdA$  mutant matches the results from a previous study (22), showing that pyoverdine is especially costly under stressful conditions, which makes cheating particularly profitable. The rapid and consistent spread of the  $\Delta fvpB$  mutant supports our hypothesis that expression of this secondary receptors is

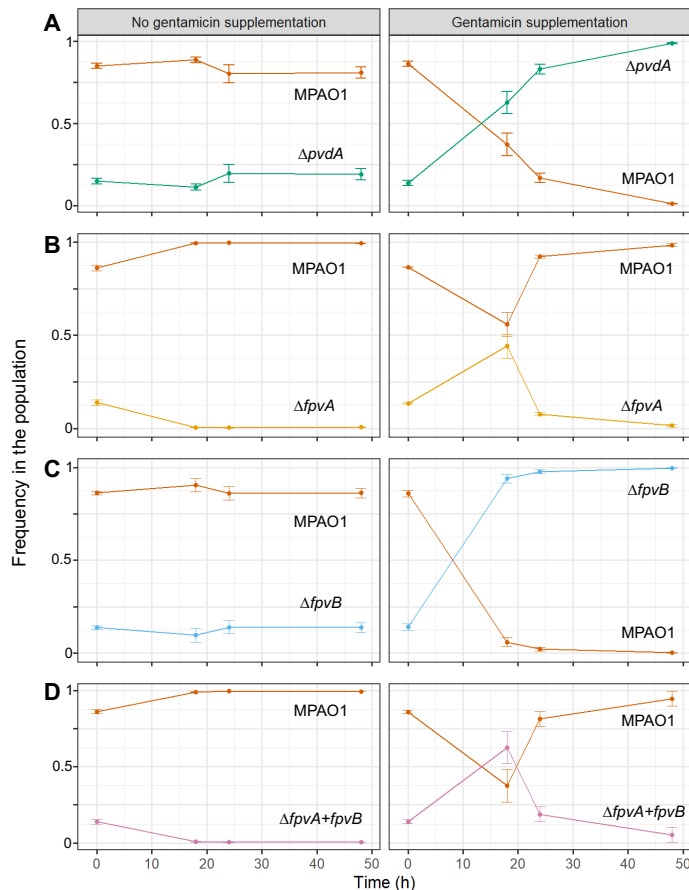

**Fig. 6. Dynamics of bacterial competition in batch cultures in iron limited CAA in the presence or absence of gentamicin.** Each plot represents the frequencies of the two competing strains over time in the absence (left column) or presence (right column) of gentamicin. Initial proportions were 0.85:0.15 of, respectively, MPAO1 and the mutants  $\Delta pvdA$  (A),  $\Delta fpvA$  (B),  $\Delta fpvB$  (C) and  $\Delta fpvA+fpvB$  (D). Frequencies were determined analysing  $5 \cdot 10^4$  event counts in a flow cytometer. Error bars represent standard error of the mean from three biological replicates with alternate fluorescent tags (GFP and RFP; results of one competition were confirmed determining cfus in a plating assay and are shown in Fig. S8).

particularly costly under antibiotic stress and its deletion allows mutants to invade from rare.

#### **The $\Delta fpvB$ mutant is a suitable Trojan horse in structured biofilms and in an animal model**

The presence of spatial structure limits the diffusion of public goods such as pyoverdine, thereby leading to changes in pyoverdine distribution and uptake rates. This in turn can feed back on the dynamics between competing strains in microbial populations (25,26). To test whether  $\Delta fpvB$  mutants can also invade MPAO1 populations in spatially structured environments, we first repeated the competition experiments by inoculating mixtures of MPAO1 and the different mutants (0.85:0.15 MPAO1:mutant initial mixing ratio) into a multichannel chamber (see Methods) in iron limited CAA, where cells attach to the surface and form structured biofilms. After 48 hours, the resulting biofilms were imaged with a confocal microscope and quantitative information was obtained by integrating the area in the image corresponding to each colour. As in liquid cultures, we found that both  $\Delta pvdA$  and  $\Delta fpvB$  dominated the biofilm in the presence of gentamicin, driving MPAO1 to almost complete extinction (Fig.

7A). In contrast,  $\Delta pvdA$  (in the absence of gentamicin) and  $\Delta fpvA$  mutants were able to co-exist with MPAO1 but could not dominate it. Unlike in liquid cultures, these latter set of mutants could increase in frequency in the biofilms (Fig. 7A).

We then used *Galleria mellonella* larvae as a model to reproduce the spatial structure *P. aeruginosa* would face in a host during an infection (27). We infected larvae with mono- and mixed cultures in the presence or absence of gentamicin following a standard protocol of infection (28), using  $10^2$ - $10^3$  cells as the inoculum. Single strain infections were performed with MPAO1,  $\Delta fpvA$  and  $\Delta fpvB$  in order to obtain survival curves of the animal host in the presence and absence of gentamicin. Independently of the presence of the antibiotic, all larvae died within 22 hours when infected with bacteria, and there were no significant differences between the two treatments (Fig. S11). We then tested whether  $\Delta fpvB$  can also dominate MPAO1 in this host environment by establishing mixed infection with the two competing strains. We found that this was indeed the case (Fig. 7B). Starting from an initial proportion of  $0.46 \pm 0.04$ ,  $\Delta fpvB$  increased to frequencies of  $0.76 \pm 0.02$  (without gentamicin) and  $0.80 \pm 0.06$  (with gentamicin) in only 15 hours. These results show that even in the animal model the  $\Delta fpvB$  mutant can invade wild type populations.

#### **Discussion**

Selective interventions steering the evolutionary dynamics of microbial communities with the main goal of reducing antibiotic usage are at the core of microbial evolutionary medicine (29). In this work we have investigated the effect of interfering with the reception of pyoverdine in *P. aeruginosa* as a way to engineer strains with the potential of invading wildtype populations. Our results show that versatile pyoverdine uptake strategies are beneficial in the absence of a stressor, possibly reflecting evolutionary adaptations to environments with limited and/or fluctuating iron availabilities, but are costly under antibiotic stress. This fitness trade-off can be used to engineer a highly invasive strain, potentially useful as a Trojan horse. Among the mutants tested,  $\Delta fpvB$  that lacks the secondary receptor outcompeted MPAO1 due to a lower cost of pyoverdine production while modulating high receptor-linked benefits when in the presence of the antibiotic gentamicin used as an environmental stressor. In this condition all strains responded to gentamicin by increasing pyoverdine production, which resulted in a significant delay in growth as well as a lower growth rate in MPAO1. It required 30 times more pyoverdine to reach the maximum growth rate compared to 2.5 times in the other strains including  $\Delta fpvB$ . The ability of gentamicin to increase the expression of some genes involved in pyoverdine and pyochelin (secondary iron chelator) synthesis even when iron is available has been described previously (30,31) but the precise mechanism by which this takes place is unknown.

Our results offer insights into the properties of the secondary receptor: supplementing with pyoverdine support that growth at the expense of FpvB was suboptimal, likely due to a lower efficiency in pyoverdine uptake via FpvB – both receptors share a 54% amino acid sequence similarity (38% identity) – (13,32). However, FpvB can be used as a dial to control growth kinetics and its overexpression mitigated the growth defects of a FpvA mutant but was detrimental for MPAO1, which exhibited a delayed growth and required a higher pyoverdine production to reach its maximum growth rate. The differences can be attributed to the molecular intervention impairing the regulatory network that directly links pyoverdine synthesis and reception, a scenario where  $\Delta fpvB$  had a selective advantage. Actually, pyoverdine receptors generate a cost to the cells (33) and mutations in FpvB

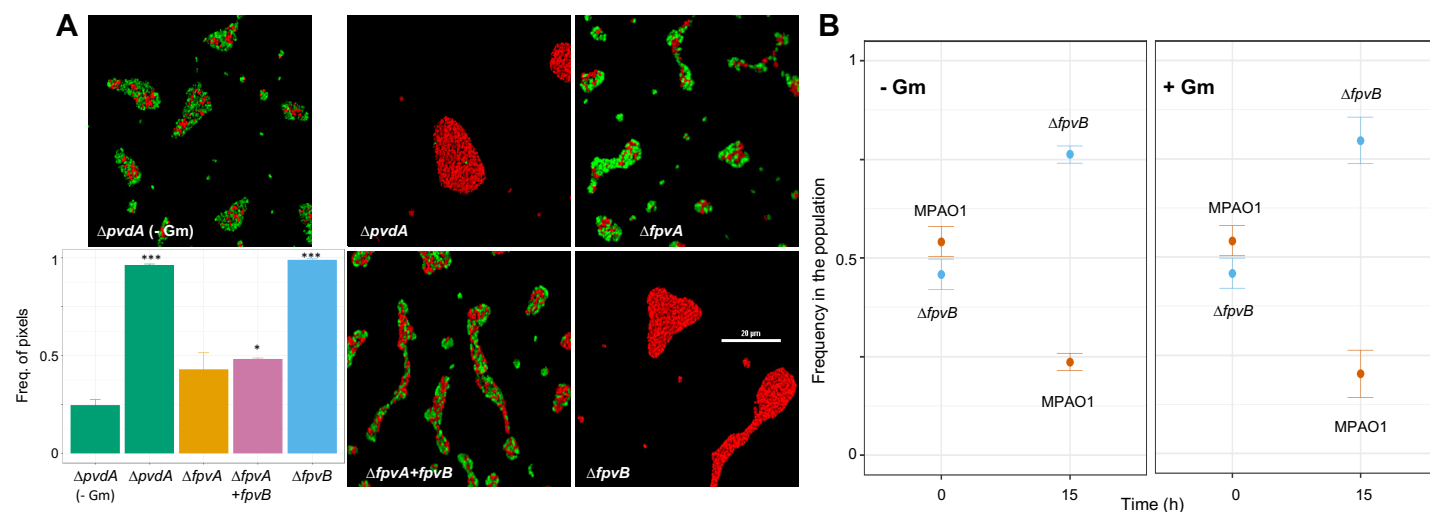

**Fig. 7. Dynamics of bacterial competition in structured environments.** (A) *In-vitro* biofilm formation in competition assays between MPAO1 and the mutants indicated. All pictures and bars correspond to cultures with gentamicin except the labelled as -Gm. Bars represent pixel frequency of red pixels (mutant strains). Each image is representative of a set of 10 randomly selected areas (selected using phase contrast to avoid bias) for each condition, taken for each of the three biological replicates, from which standard error bars were generated. Scale bars equal 20  $\mu$ m (see Figs. S9 and S10 for larger pictures). Asterisks show significant differences compared to the competition MPAO1- $\Delta pvdA$  (-Gm) in a One-way ANOVA test complemented by a Dunnett post-hoc test. (B) Competition assays in *G. mellonella*. A population of  $10^2$  to  $10^3$  cells containing an initial proportion of 0.5:0.5 MPAO1 to  $\Delta fpvB$  was injected in the larvae in the absence (left panel; -Gm) and presence (right panel; +Gm) and let grow for 15 hours. Subsequently, animals were culled and strain frequencies quantified. Error bars represent standard error of the mean for 3 biological replicates with alternate fluorescent tags (GFP and RFP).

have been detected in clinical isolates obtained from cystic fibrosis patients (34). Our results show that FpvB is generally advantageous under iron limitation, but generates a big cost to the cell in stressful conditions. In these conditions, a mutant lacking the secondary receptor is fitter than the wildtype and therefore more resistant, becoming an ideal candidate for outcompeting MPAO1.

The growth profiles in monocultures were predictive of the outcomes of the competition experiments in liquid cultures apart for  $\Delta pvdA$ , which grew badly in isolation, but performed well in co-culture with MPAO1 in the absence of gentamicin. This pattern is compatible with cheating, where pyoverdine non-producers obtain benefits by exploiting producers, especially at low initial frequency (35). When competing against receptor mutants, MPAO1 had equal fitness compared to  $\Delta fpvB$ , but outcompeted  $\Delta fpvA$ , showing that FpvA is essential for efficient iron acquisition in iron-limited medium. However, when gentamicin was added, both  $\Delta fpvB$  and  $\Delta pvdA$  drove MPAO1 to almost extinction, with the latter finding being in agreement with a previous study (22). Thus, both mutants could be used as Trojan horses although we predict that  $\Delta fpvB$  is the more promising candidate because it does it faster and, importantly, because it does not depend on the presence of a pyoverdine producer for iron acquisition. Moreover, our results show that gentamicin is essential for  $\Delta pvdA$  invasion, a finding that could explain the apparent discrepancy in the selective advantage of pyoverdine-deficient mutants reported in previous studies. Specifically, pyoverdine mutants were unable to invade *P. aeruginosa* wild type strains in infections of the animal models *G. mellonella* and *C. elegans* where no antibiotics were administered (4,11), while they could efficiently displace wild type pyoverdine producers in the lungs of patients with cystic fibrosis, who typically undergo intense antibiotic treatments (36).

The strain  $\Delta fpvB$  dominated competitions on a surface in the presence of gentamicin. In fact, in this condition all mutants increased their frequency against MPAO1, which suggests that pyoverdine is not a relevant driver of the population dynamics in this condition. This could be the result of additional factors, such

as the anoxic environment found in biofilms, which increase iron availability (37). In addition,  $\Delta fpvB$  also invaded MPAO1 in infections of the animal model *G. mellonella*, in which *P. aeruginosa* shows a virulence that correlates with that observed in mice (38). Unlike in the previous scenarios, the presence of gentamicin in the animal did not lead to observable differences in the growth of the strains and, as a result, their pathogenicity was not affected. This is consistent with a previous meta-analysis of different animal models showing that the lack of pyoverdine modestly reduces virulence *in vivo*, particularly in invertebrates (39). As in biofilms, iron acquisition via pyoverdine might not be essential for colonising the larvae. However, this does not mean that competition-cooperation dynamics are not taking place and, in fact, our results confirm that the pyoverdine system confers a fitness advantage for growth in the animal (11). This suggests that the *G. mellonella* can at least partly replicate the stress conditions that impact the *in vitro* evolutionary dynamics based on pyoverdine (40,41).

Our findings highlight the potential of manipulating pyoverdine receptors to obtain Trojan-horse strains with the ability to dominate a population under specific conditions. Out of the strains characterised,  $\Delta fpvB$  was capable of invading MPAO1 both in structured and unstructured environments including an animal model. It did not require the presence of exogenous pyoverdine for growth, since it could still produce it, therefore overcoming the limitations of strains deficient in pyoverdine production. This mutant could constitute the basis of a bacterial vehicle for the deployment of traits of interest in wildtype populations.

## Materials and Methods

### Strains

All *Pseudomonas* strains were obtained from a transposon mutant library and are described in the supplementary materials. *E. coli* DH5 $\alpha$  and One Shot™ PIR2 (ThermoFisher) were required for

standard genetic manipulations and plasmid maintenance (Tables S1 and S2).

### **Culture conditions and real time monitoring of pyoverdine, OD and FP production**

Lysogeny broth (LB) contained 10 g peptone, 5 g yeast extract and 10 g NaCl per litre of media. For agar plates, 15 g·L<sup>-1</sup> of agar were added. Iron-limited casamino acid media (CAA) was prepared using 5 g vitamin free casamino acids, 1.18 g K<sub>2</sub>HPO<sub>4</sub>·3H<sub>2</sub>O, 0.25 g MgSO<sub>4</sub>·7H<sub>2</sub>O, per litre of distilled H<sub>2</sub>O, supplemented with 200 µg·mL<sup>-1</sup> of human apo-transferrin, and 20 mM sodium bicarbonate. CAA pH was adjusted to 7 and buffered using 50 mM HEPES. Apo-transferrin is used to avoid iron sequestration by secondary chelators generated by *P. aeruginosa*, while sodium bicarbonate is required for its activity (7). Pseudomonas Isolation Agar plates were prepared following the manufacturer (Fisher Scientific, UK) instructions.

Media were supplemented with 20 µg·mL<sup>-1</sup> of gentamycin, 30 µg·mL<sup>-1</sup> of chloramphenicol, 50 µg·mL<sup>-1</sup> of kanamycin and 150 µg·mL<sup>-1</sup> of ampicillin when required. To supplement bacterial growth with pyoverdine, *P. aeruginosa*  $\Delta$ pchE was grown in CAA for 48 hours and the supernatant was filter-sterilized three times. The use of this mutant avoided production of the secondary iron chelator pyochelin (42). In the required condition, this supernatant was added (10% vol/vol) to fresh CAA. All reagents were obtained from Sigma-Aldrich (UK) unless stated otherwise.

For all monocultures, cells were taken from single clone frozen stocks and grown overnight at 37°C 200 rpm in 5 mL LB supplemented with antibiotics if required. The following day, cells were transferred (1%) to fresh LB in standard 24 well plates and grown to mid-exponential phase (BMG-Clariostar, 37°C, 500 rpm). Once cells reached mid-exponential phase, they were washed 3 times in phosphate saline buffer (PBS), and OD<sub>600</sub> normalized to 1 (Thermo Scientific Evolution 605 UV-Visible Spectrophotometer). Cells were then diluted to OD<sub>600</sub> 0.01 in CAA (supplemented when required with pyoverdine and/or gentamycin) and grown in standard 96 well plates (BMG-Clariostar, 37°C, 500 rpm). OD<sub>600</sub>, pyoverdine fluorescence (450 nm(Ex)/490 nm(Em)) and mCherry fluorescence (587 nm(Ex)/610 nm(Em)) were measured every 30 minutes.

### **General molecular biology techniques**

DNA amplification was performed using the Q5 DNA polymerase kit (New England Biolabs, USA) and the corresponding primers (Table S3) following the recommendations of the manufacturer.

Otherwise stated, plasmid construction was carried out using standard digestion and ligation procedures. The general protocol involved plasmid extraction using the QIAprep spin mini-prep kit (Qiagen, UK). 1 µg of plasmid was mixed with 10 U of the corresponding restriction enzymes and the corresponding amount of 1X restriction buffer in final 50 µL volume (New England Biolabs, USA). Reactions were incubated at least for one hour at the recommended temperature. After digestion, fragments were purified using the QIAquick PCR Purification Kit (Qiagen, UK) or, QIAquick Gel Extraction Kit (Qiagen, UK) following the instructions of the manufacturer. The resulting plasmids were chemically transformed into DH5 $\alpha$  or One Shot™ PIR2 chemically competent *E. coli* cells (Invitrogen, UK). After transformation, cells were resuspended in 1 mL of LB and grown for one hour (37°C, 200 rpm) before plating on LB agar supplemented with the required antibiotics. Descriptions of the plasmid construction

strategies as well as lists of primers, strains and plasmids used in this study can be found in the supplementary methods.

### **Tn-7 chromosomal integration**

Donor (One Shot™ PIR2 *E. coli* - for R6K plasmid replication-), recipient (*P. aeruginosa* strains) and helper strains (*E. coli* DH5 $\alpha$  carrying pRK600 and pTns-1 plasmids) were grown overnight in 5 mL of LB supplemented with the required antibiotics. The helper and donor strains were re-inoculated (1%) in 1 mL of fresh LB and grown until 0.4-0.5 OD at 37°C. The recipient strains were re-inoculated (10%) in 1 mL of fresh LB and grown for the same amount of time than the helper and donor strains at 42°C with no agitation. The cells were then washed twice with 1 mL of LB to remove antibiotics. 100 µL of each strain were mixed, centrifuged, re-suspended in 30 µL of LB and plated onto an antibiotic-free LB agar plate. After 6 hours at 37°C, the cells were recovered from the plate in 1 mL of LB. The cell pellet was harvested, resuspended in 30 µL of PBS and plated on Pseudomonas Isolation Agar with gentamycin to select for bacteria carrying the genetic construction. Tn7 presence was confirmed by colony PCR using Tn7RfW and glmsDownREV primers (Table S3) or whole genome sequencing in the case of FpvB insertion.

### **In vitro competition studies**

Once grown and OD<sub>600</sub> normalized to 1, cells were then mixed in a 0.15:0.85 (MPAO1:mutant) volumetric ratio, diluted to OD<sub>600</sub> 0.01 in 3 mL of CAA with and without gentamycin supplementation in a 50 mL falcon tube and grown at 37°C, 200 rpm for 48 h. Samples were taken at 0, 18, 24 and 48 h and diluted in PBS prior to flow cytometry. Data was analysed using a Attune NxT cytometer, counting 5·10<sup>4</sup> single events per sample. Data analysis was performed using FlowJo V10 (BD Biosciences, Europe). Flow cytometer settings, gating and representative workflow can be found in supplementary methods. Supernatants were collected to analyse gentamicin degradation using LC-MS.

To study competition in biofilms, 30 µL of OD<sub>600</sub> 0.01 cells were inoculated in a  $\mu$ -Slide VI – Flat (Ibidi, Germany) and incubated at 37°C in a humid chamber with no agitation for 48 hours. Confocal images (Nikon A1M) were collected from 10 random areas with a 60x Plan Apo lens. A single argon laser line was used with excitation wavelength of 488 nm and using an emission Nikon-FITC filter (525/50 nm) for the imaging of GFP-tagged bacteria; for RFP cells, the excitation wavelength used was 561 nm with the Nikon-mCherry (595/50 nm) emission filter. Images were quantified using colour pixel counter plugin from ImageJ.

### **Liquid chromatography and mass spectrometry**

We used mass spectrometry determination to confirm the stability of gentamicin over the course of the competition experiments. Five replicates of 5 µL for each sample and standard were injected into an Ultimate 3000 UHPLC™ system (Thermo Scientific, Bremen, Germany). The analytes were separated using a Kinetex C18 column (100 × 2.1 mm, 5 µm) at a flow rate of 0.25 mL·min<sup>-1</sup>. The autosampler temperature was set to 4°C and the column temperature to 30°C. The initial mobile phase was 99% H<sub>2</sub>O and 1% ACN (both with 0.1% FA) which was increased to 80% ACN and 20% H<sub>2</sub>O (both with 0.1% FA) over 2 minutes and then kept constant for 30 seconds. Subsequently, the mobile phase reverted to the initial composition and was allowed to equilibrate for 30 seconds before commencing the next injection. The total run time was 3 minutes. The UHPLC system was coupled to a

ThermoFisher Scientific Q Exactive™ Plus Hybrid Quadrupole mass spectrometer. The electrospray ionization source was operated with a spray voltage of 4.25 kV and a capillary temperature of 390°C. Data was acquired in positive mode, at a mass range of  $m/z$  75 to 1,000 with a resolving power of 70,000 (at  $m/z$  200), and with the automatic gain control (AGC) on and set to  $10^6$  ions. Concentrations were determined using peak ion counts for the gentamicin C1 species ( $m/z$  478.3240  $\pm$  5 ppm) measured relative to a known standard concentration of gentamicin of 20.0  $\mu\text{g}\cdot\text{mL}^{-1}$ . The gentamicin C1 species gave the highest intensity of signal (compared with the gentamicin C1a and C2 / C2a species), with an elution time of 50 seconds. The relationship between peak ion count and concentration was validated through the construction of a calibration curve using standards ranging from 0.1  $\mu\text{g}\cdot\text{mL}^{-1}$  to 20.0  $\mu\text{g}\cdot\text{mL}^{-1}$ .

### In vivo studies

*Galleria mellonella* larvae were acquired from a local supplier. Larvae were stored at 4°C and used within two weeks. As before, once cells reached mid-exponential phase, they were washed 3 times in PBS, and the OD600 was normalized to 1. Cells were then mixed in a 0.5:0.5 (MPAO1:mutant) volumetric ratio. Prior to infection, larvae were kept on ice for half an hour to prevent spontaneous movements and then dipped in 70% ethanol to remove any contaminants present on the tegument. Cells were further diluted so that a 10  $\mu\text{L}$  injection in *G. mellonella* would contain bacteria in the range of  $10^2$ - $10^3$  cells. Following this, a stock solution of gentamicin was diluted accordingly in PBS to obtain a 20  $\mu\text{g}\cdot\text{mL}^{-1}$  final concentration in the larvae after a 10  $\mu\text{L}$  injection, assuming that every larvae as a volume of 1 mL. Both bacteria and gentamicin were injected in the last pair of prolegs using a Hamilton syringe and a peristaltic pump. Syringes were discarded after each treatment to prevent carryover between samples. Larvae were incubated at 37°C and their survival was checked every hour for mono-infections. Larvae were considered dead if there was no sudden movement after touch with a pipette tip on the head and culled at 15 hours with the haemocoel being recovered. To do so, larvae were kept in ice for 30 minutes until no movement was detected, then a small incision was generated using a sterile scalpel to recover haemocoel, which was diluted and 20  $\mu\text{L}$  were plated on Pseudomonas Isolation Agar supplemented with gentamicin to calculate population proportions. Cells were allowed to grow for 18 hours at 37°C and then stored for 3 days at 4°C, which facilitates their differentiation through fluorescent reporter accumulation in the bacterial colonies.

### Data analyses

All graphs were plotted using ggplot2 (R package). OD was fitted using Fitderiv (43) in order to obtain derivative curves accounting for growth rates at each time point. Pyoverdine production per cell was calculated as the fluorescence at 450 nm(Ex)/490 nm(Em) divided by OD600 at each time point. The area under the curve (AUC) of pyoverdine production up to the maximum growth rate was obtained using the OD600 derivative curve calculated with Fitderiv as an indicator of the point of maximum growth rate. The calculations of AUC were performed using Graphpad Prism 7.

All experiments were conducted from the beginning on three different days (biological replicates) carrying at least three technical replicates each time. One-way ANOVA complemented with Dunnett post-hoc tests were used to analyse the significance of differences found in growth rates, pyoverdine production up to

the maximum growth rate and the frequency of strains observed in biofilm formation experiments. The control group for comparison in each assay was MPAO1 in the corresponding condition, except in the biofilm experiments, in which samples were compared to the frequencies obtained in the MPAO- $\Delta$ *pvdA* (-Gm) competition. t-tests were used for the analysis of growth rates and pyoverdine production up to maximum growth rate when overexpressing *fpvB*, as well as in the competition studies in unstructured environments and in *G. mellonella*. The control groups were the corresponding 'empty' construct in *fpvB* overexpression experiments or the initial frequencies of each of the strains in the competitions. The survival curve analyses were performed using Long-Rank test from survminer, an R package. In all cases, the level of significance was established at  $p \leq 0.05$ ,  $p \leq 0.01$  and  $p \leq 0.001$  represented in the figures with, respectively, one, two or three asterisks.

### Acknowledgements

The authors would like to thank Dr Melanie Ghouil, Prof. Stuart West and Prof. Craig McLean (University of Oxford), and Dr Jorge Gutiérrez (University of Surrey) for the insightful discussions on population invasion and their constructive feedback on the manuscript. The authors are indebted to Dr Helen King, Dr Mandy Fivian-Hughes, Kate Reid and Anita Sicilia for their technical assistance. JG was the recipient of a PhD studentship of the University of Surrey and an EMBO Short-Term Fellowship (ASFT number: 8166). CAR and JJ acknowledge the support received from the Biotechnology and Biological Sciences Research Council (BBSRC) (grants BB/L02683X/1 and BB/T011289/1 from the ERA-Cobiotech programme of the EU). MS, CC and MB acknowledge the support from the Engineering and Physical Sciences Research Council through a strategic equipment grant (EP/P001440/1). RK has received funding from the European Research Council (ERC) under the European Union's Horizon 2020 research and innovation programme (grant agreement no. 681295). ÖÖ has received funding from the Forschungskredit by the University of Zurich.

### Conflict of interests

The authors declare that they do not have any conflicts of interests.

### Author contributions

JG, CAR, RK and JJ designed and supervised the study. JG, MS1, ÖÖ, MS2 and CC conducted experimental work. All authors analysed the data and wrote the manuscript.

### References

1. West SA, Griffin AS, Gardner A. Social semantics: altruism, cooperation, mutualism, strong reciprocity and group selection. *J Evol Biol.* 2007 Mar;20(2):415–32.
2. Özkaya Ö, Xavier KB, Dionisio F, Balbontín R. Maintenance of microbial cooperation mediated by public goods in single- and multiple-trait scenarios. *J Bacteriol.* 2017 Nov;199(22):e00297–17.
3. Brown SP, West SA, Diggle SP, Griffin AS. Social evolution in micro-organisms and a Trojan horse approach to medical intervention strategies. *Philos Trans R Soc B Biol Sci.* 2009 Nov;364(1533):3157–68.
4. Rezzoagli C, Granato ET, Kümmerli R. In-vivo microscopy reveals the impact of *Pseudomonas aeruginosa* social



- interactions on host colonization. *ISME J.* 2019;13(10):2403–14.
5. Granato ET, Ziegenhain C, Marvig RL, Kümmerli R. Low spatial structure and selection against secreted virulence factors attenuates pathogenicity in *Pseudomonas aeruginosa*. *ISME J.* 2018;12(12):2907–18.
  6. Bruger E, Waters C. Sharing the sandbox: Evolutionary mechanisms that maintain bacterial cooperation. *F1000Research.* 2015;4.
  7. Griffin AS, West SA, Buckling A. Cooperation and competition in pathogenic bacteria. *Nature.* 2004 Aug;430(7003):1024–7.
  8. Nadal Jimenez P, Koch G, Thompson JA, Xavier KB, Cool RH, Quax WJ. The multiple signaling systems regulating virulence in *Pseudomonas aeruginosa*. *Microbiol Mol Biol Rev.* 2012 Mar 1;76(1):46 LP – 65.
  9. Ringel MT, Brüser T. The biosynthesis of pyoverdines. *Microb Cell.* 2018 Oct;5(10):424–37.
  10. Butaitė E, Baumgartner M, Wyder S, Kümmerli R. Siderophore cheating and cheating resistance shape competition for iron in soil and freshwater *Pseudomonas* communities. *Nat Commun.* 2017 Dec;8(1):414.
  11. Harrison F, Browning LE, Vos M, Buckling A. Cooperation and virulence in acute *Pseudomonas aeruginosa* infections. *BMC Biol.* 2006 Jul;4(1):21.
  12. Meyer J-M, Stintzi A, Poole K. The ferripyoverdine receptor FpvA of *Pseudomonas aeruginosa* PAO1 recognizes the ferripyoverdines of *P. aeruginosa* PAO1 and *P. fluorescens* ATCC 13525. *FEMS Microbiol Lett.* 1999 Jan;170(1):145–50.
  13. Ghysels B, Dieu BTM, Beatson SA, Pirnay J-P, Ochsner UA, Vasil ML, et al. FpvB, an alternative type I ferripyoverdine receptor of *Pseudomonas aeruginosa*. *Microbiology.* 2004 Jun;150(6):1671–80.
  14. Imperi F, Tiburzi F, Visca P. Molecular basis of pyoverdine siderophore recycling in *Pseudomonas aeruginosa*. *Proc Natl Acad Sci.* 2009 Dec;106(48):20440–5.
  15. Rédly GA, Poole K. Pyoverdine-mediated regulation of FpvA synthesis in *Pseudomonas aeruginosa*: involvement of a probable extracytoplasmic-function sigma factor, FpvI. *J Bacteriol.* 2003 Feb;185(4):1261–5.
  16. Bishop TF, Martin LW, Lamont IL. Activation of a cell surface signaling pathway in *Pseudomonas aeruginosa* requires ClpP protease and new sigma factor synthesis. *Front Microbiol.* 2017;8:2442.
  17. Lamont IL, Beare PA, Ochsner U, Vasil AI, Vasil ML. Siderophore-mediated signaling regulates virulence factor production in *Pseudomonas aeruginosa*. *Proc Natl Acad Sci U S A.* 2002 May;99(10):7072–7.
  18. Spencer MR, Beare PA, Lamont IL. Role of cell surface signaling in proteolysis of an alternative sigma factor in *Pseudomonas aeruginosa*. *J Bacteriol.* 2008 Jul;190(14):4865–9.
  19. Leoni L, Ciervo A, Orsi N, Visca P. Iron-regulated transcription of the *pvdA* gene in *Pseudomonas aeruginosa*: effect of Fur and PvdS on promoter activity. *J Bacteriol.* 1996 Apr 1;178(8):2299 LP – 2313.
  20. Schulz S, Eckweiler D, Bielecka A, Nicolai T, Franke R, Dötsch A, et al. Elucidation of sigma factor-associated networks in *Pseudomonas aeruginosa* reveals a modular architecture with limited and function-specific crosstalk. *PLoS Pathog.* 2015 Mar;11(3):e1004744.
  21. Dao K-HT, Hamer KE, Clark CL, Harshman LG. Pyoverdine production by *Pseudomonas aeruginosa* exposed to metals or an oxidative stress agent. *Ecol Appl.* 1999 Apr 5;9(2):441–8.
  22. Vasse M, Noble RJ, Akhmetzhanov AR, Torres-Barceló C, Gurney J, Benateau S, et al. Antibiotic stress selects against cooperation in the pathogenic bacterium *Pseudomonas aeruginosa*. *Proc Natl Acad Sci U S A.* 2017;114(3):546–51.
  23. Ratjen F, Brockhaus F, Angyalosi G. Aminoglycoside therapy against *Pseudomonas aeruginosa* in cystic fibrosis: A review. *J Cyst Fibros.* 2009 Dec;8(6):361–9.
  24. Zobel S, Benedetti I, Eisenbach L, de Lorenzo V, Wierckx N, Blank LM. Tn7-based device for calibrated heterologous gene expression in *Pseudomonas putida*. *ACS Synth Biol.* 2015 Dec;4(12):1341–51.
  25. Kümmerli R, Griffin AS, West SA, Buckling A, Harrison F. Viscous medium promotes cooperation in the pathogenic bacterium *Pseudomonas aeruginosa*. *Proceedings Biol Sci.* 2009 Oct;276(1672):3531–8.
  26. Dobay A, Bagheri HC, Messina A, Kümmerli R, Rankin DJ. Interaction effects of cell diffusion, cell density and public goods properties on the evolution of cooperation in digital microbes. *J Evol Biol.* 2014 Sep;27(9):1869–77.
  27. Tsai CJ-Y, Loh JMS, Proft T. *Galleria mellonella* infection models for the study of bacterial diseases and for antimicrobial drug testing. *Virulence.* 2016 Apr;7(3):214–29.
  28. Weigert M, Ross-Gillespie A, Leinweber A, Pessi G, Brown SP, Kümmerli R. Manipulating virulence factor availability can have complex consequences for infections. *Evol Appl.* 2017 Jan;10(1):91–101.
  29. Andersen SB, Shapiro BJ, Vandenbroucke-Grauls C, de Vos MGJ. Microbial evolutionary medicine: from theory to clinical practice. *Lancet Infect Dis.* 2019 Apr;0(0).
  30. Hancock REW, Marr AK, Overhage J, Bains M. The Lon protease of *Pseudomonas aeruginosa* is induced by aminoglycosides and is involved in biofilm formation and motility. *Microbiology.* 2007 Feb;153(2):474–82.
  31. Linares JF, Gustafsson I, Baquero F, Martinez JL. Antibiotics as intermicrobial signaling agents instead of weapons. *Proc Natl Acad Sci U S A.* 2006 Dec;103(51):19484–9.
  32. James HE, Beare PA, Martin LW, Lamont IL. Mutational analysis of a bifunctional ferrisiderophore receptor and signal-transducing protein from *Pseudomonas aeruginosa*. *J Bacteriol.* 2005 Jul;187(13):4514–20.
  33. Andersen SB, Marvig RL, Molin S, Krogh Johansen H, Griffin AS. Long-term social dynamics drive loss of function in pathogenic bacteria. *Proc Natl Acad Sci.* 2015;112(34):10756–61.
  34. Dingemans J, Ye L, Hildebrand F, Tontodonati F, Craggs M, Bilocq F, et al. The deletion of TonB-dependent receptor genes is part of the genome reduction process that occurs during adaptation of *Pseudomonas aeruginosa* to the cystic fibrosis lung. *Pathog Dis.* 2014 Jun;71(1):26–38.
  35. Ross-Gillespie A, Gardner A, West SA, Griffin AS. Frequency dependence and cooperation: Theory and a test with bacteria. *Am Nat.* 2007;170(3):331–42.
  36. Andersen SB, Marvig RL, Molin S, Krogh Johansen H, Griffin AS. Long-term social dynamics drive loss of function in pathogenic bacteria. *Proc Natl Acad Sci U S A.* 2015 Aug;112(34):10756–61.
  37. Tyrrell J, Callaghan M. Iron acquisition in the cystic fibrosis

- lung and potential for novel therapeutic strategies. *Microbiology*. 2016;162(2):191–205.
38. Jander G, Rahme LG, Ausubel FM. Positive correlation between virulence of *Pseudomonas aeruginosa* mutants in mice and insects. *J Bacteriol*. 2000 Jul;182(13):3843–5.
  39. Granato ET, Harrison F, Kümmerli R, Ross-Gillespie A. Do bacterial “virulence factors” always increase virulence? a meta-analysis of pyoverdine production in *Pseudomonas aeruginosa* as a test case. *Front Microbiol*. 2016;7:1952.
  40. Pereira T, de Barros P, Fugisaki L, Rossoni R, Ribeiro F, de Menezes R, et al. Recent advances in the use of *Galleria mellonella* model to study immune responses against human pathogens. *J Fungi*. 2018 Nov;4(4):128.
  41. Andrejko M, Mizerska-Dudka M. Effect of *Pseudomonas aeruginosa* elastase B on level and activity of immune proteins/peptides of *Galleria mellonella* hemolymph. *J Insect Sci*. 2012 Jul;12(88):1–14.
  42. Jacobs MA, Alwood A, Thaipisuttikul I, Spencer D, Haugen E, Ernst S, et al. Comprehensive transposon mutant library of *Pseudomonas aeruginosa*. *Proc Natl Acad Sci U S A*. 2003 Nov;100(24):14339–44.
  43. Swain PS, Stevenson K, Leary A, Montano-Gutierrez LF, Clark IBN, Vogel J, et al. Inferring time derivatives including cell growth rates using Gaussian processes. *Nat Commun*. 2016 Dec;7(1):13766.
